# Supplementary material
Source: Springer Nature journal article supplement (https://www.springermedizin.de/resource/supplementary/12968_2012_3270_MOESM5_ESM.pdf/9583514)

a

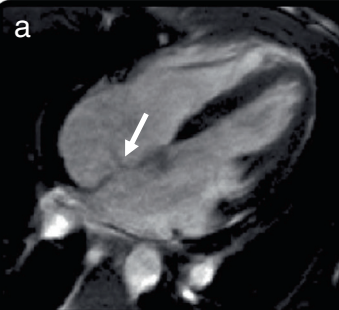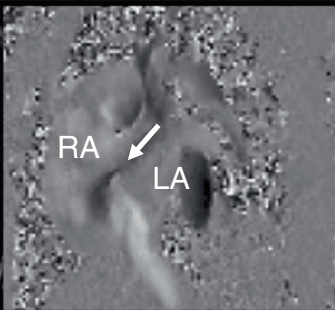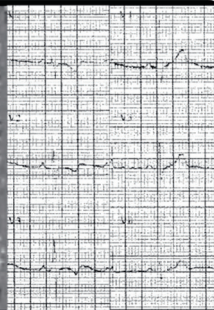

b

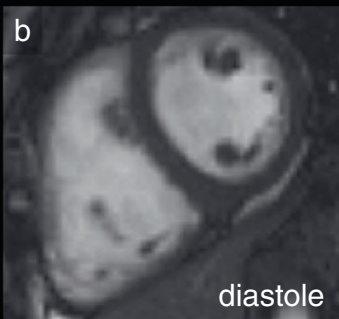

diastole

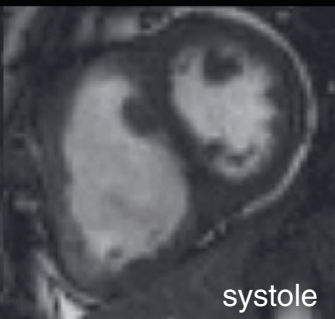

systole

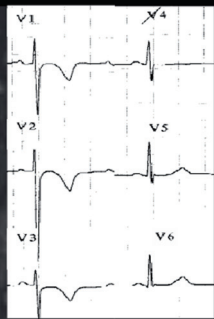

Supplement: MOESM5 [file 9583514]
